# Supplementary material for: Preharvest Mandarin Rind Disorder: Insights into Varietal Differences and Preharvest Treatments Effects on Postharvest Quality
Source: MDPI journal article supplement (doi:10.3390/plants13081040), 2024-04-09
Supplement: s1 [file s1]

## Supplementary Data

**Table S-1:** Fruit color index of four mandarin varieties during postharvest in response to various treatments in 2019 (A) and 2020 (B) seasons. Fruits were stored at 0.5 °C and 7.5 °C for four weeks and then for one week at 20 ° C. Data are average of four replicates, and each contains 20 fruit,  $\pm$  the standard error, letters indicate the statistical difference among treatments and varieties at the level of 0.05.

A

|                  | 0.5 °C            |                   |                  |                  |                  | 7.5 °C           |                   |                   |                  |                  |                  |
|------------------|-------------------|-------------------|------------------|------------------|------------------|------------------|-------------------|-------------------|------------------|------------------|------------------|
|                  | Control           | Vapor Gard        | 2,4-D            | GA               | Mean             | Control          | Vapor Gard        | 2,4-D             | GA               | Mean             |                  |
| Owari            | 0.47 $\pm$ 0.002a | 0.46 $\pm$ 0.004a | 0.47 $\pm$ 0.01a | 0.14 $\pm$ 0.06b | 0.38 $\pm$ 0.04b | 0.52 $\pm$ 0.01a | 0.52 $\pm$ 0.002a | 0.50 $\pm$ 0.004a | 0.38 $\pm$ 0.04b | 0.48 $\pm$ 0.02c | 0.43 $\pm$ 0.02B |
| Page             | 0.50 $\pm$ 0.01a  | 0.49 $\pm$ 0.01ab | 0.46 $\pm$ 0.01a | 0.34 $\pm$ 0.02b | 0.45 $\pm$ 0.02a | 0.63 $\pm$ 0.01a | 0.61 $\pm$ 0.01a  | 0.60 $\pm$ 0.01a  | 0.54 $\pm$ 0.03b | 0.60 $\pm$ 0.01a | 0.52 $\pm$ 0.02A |
| W. Murcott       | 0.56 $\pm$ 0.01a  | 0.52 $\pm$ 0.01a  | 0.54 $\pm$ 0.01a | 0.31 $\pm$ 0.04b | 0.48 $\pm$ 0.03a | 0.59 $\pm$ 0.01a | 0.55 $\pm$ 0.01a  | 0.55 $\pm$ 0.02a  | 0.41 $\pm$ 0.02b | 0.52 $\pm$ 0.02b | 0.50 $\pm$ 0.02A |
| Tango            | 0.50 $\pm$ 0.01a  | 0.48 $\pm$ 0.01ab | 0.40 $\pm$ 0.02b | 0.22 $\pm$ 0.07c | 0.38 $\pm$ 0.04b | 0.52 $\pm$ 0.01a | 0.51 $\pm$ 0a     | 0.50 $\pm$ 0.02a  | 0.29 $\pm$ 0.05b | 0.44 $\pm$ 0.04d | 0.44 $\pm$ 0.02B |
|                  | 0.51 $\pm$ 0.01a  | 0.49 $\pm$ 0.01ab | 0.46 $\pm$ 0.01b | 0.24 $\pm$ 0.03c |                  | 0.57 $\pm$ 0.01a | 0.54 $\pm$ 0.01a  | 0.54 $\pm$ 0.01a  | 0.39 $\pm$ 0.04b |                  |                  |
| 0.43 $\pm$ 0.02A |                   |                   |                  |                  |                  | 0.52 $\pm$ 0.01B |                   |                   |                  |                  |                  |

B

|                  | 0.5 °C           |                   |                   |                  |                  | 7.5 °C            |                  |                   |                  |                  |                   |
|------------------|------------------|-------------------|-------------------|------------------|------------------|-------------------|------------------|-------------------|------------------|------------------|-------------------|
|                  | Control          | Vapor Gard        | 2,4-D             | GA               | Mean             | Control           | Vapor Gard       | 2,4-D             | GA               |                  |                   |
| Owari            | 0.46 $\pm$ 0.01a | 0.47 $\pm$ 0.01a  | 0.45 $\pm$ 0.01a  | 0.3 $\pm$ 0.01b  | 0.42 $\pm$ 0.02d | 0.49 $\pm$ 0.01a  | 0.48 $\pm$ 0.01a | 0.49 $\pm$ 0.01a  | 0.38 $\pm$ 0.02b | 0.46 $\pm$ 0.01c | 0.43 $\pm$ 0.01C  |
| Page             | 0.55 $\pm$ 0.01a | 0.52 $\pm$ 0.004a | 0.52 $\pm$ 0.01a  | 0.37 $\pm$ 0.02b | 0.49 $\pm$ 0.02c | 0.64 $\pm$ 0.01a  | 0.65 $\pm$ 0.01a | 0.61 $\pm$ 0.003b | 0.52 $\pm$ 0.01c | 0.60 $\pm$ 0.01a | 0.52 $\pm$ 0.01A  |
| W. Murcott       | 0.58 $\pm$ 0.01a | 0.52 $\pm$ 0.01b  | 0.54 $\pm$ 0.01ab | 0.40 $\pm$ 0.04c | 0.51 $\pm$ 0.02b | 0.58 $\pm$ 0.01a  | 0.54 $\pm$ 0.01a | 0.56 $\pm$ 0.003a | 0.46 $\pm$ 0.01b | 0.54 $\pm$ 0.01b | 0.5 $\pm$ 0.01B   |
| Tango            | 0.6 $\pm$ 0.01a  | 0.52 $\pm$ 0.01a  | 0.48 $\pm$ 0.01a  | 0.44 $\pm$ 0.01a | 0.53 $\pm$ 0.01a | 0.48 $\pm$ 0.003a | 0.52 $\pm$ 0.01b | 0.6 $\pm$ 0.01a   | 0.44 $\pm$ 0.01b | 0.52 $\pm$ 0.01b | 0.44 $\pm$ 0.004B |
|                  | 0.54 $\pm$ 0.01a | 0.50 $\pm$ 0.01b  | 0.52 $\pm$ 0.01b  | 0.40 $\pm$ 0.02c |                  | 0.56 $\pm$ 0.01a  | 0.55 $\pm$ 0.02b | 0.55 $\pm$ 0.01b  | 0.46 $\pm$ 0.01c |                  |                   |
| 0.49 $\pm$ 0.01B |                  |                   |                   |                  |                  | 0.53 $\pm$ 0.01A  |                  |                   |                  |                  |                   |

**Table S-2:** Fruit sugar content (Brix) of four mandarin varieties during postharvest in response to various treatments in 2019 (A) and 2020 (B) seasons. Fruits were stored at 0.5 °C and 7.5 °C for four weeks and then for one week at 20 ° C. Data are average of four replicates, and each contains 20 fruit,  $\pm$  the standard error, letters indicate the statistical difference among treatments and varieties at the level of 0.05.

| A           |             |              |              |              |              |              |              |             |             |             |             |  |
|-------------|-------------|--------------|--------------|--------------|--------------|--------------|--------------|-------------|-------------|-------------|-------------|--|
|             | 0.5 °C      |              |              |              |              | 7.5 °C       |              |             |             |             |             |  |
|             | Control     | Vapor Gard   | 2,4-D        | GA           | Mean         | Control      | Vapor Gard   | 2,4-D       | GA          | Mean        |             |  |
| Owari       | 13.85±0.16a | 13.35±0.35ab | 13.7±0.16a   | 12.53±0.5b   | 13.36±0.20a  | 13.7±0.2a    | 13.35±0.09a  | 13.4±0.24a  | 11.88±0.17b | 13.08±0.20a | 13.22±0.14a |  |
| Page        | 12.03±0.47a | 12±0.48a     | 11.68±0.21a  | 11.43±0.48a  | 11.78±0.20c  | 11.88±0.25a  | 12.05±0.51a  | 11.8±0.25a  | 11.8±0.31a  | 11.88±0.16b | 11.83±0.13c |  |
| W. Murcott  | 13.13±0.29a | 12.43±0.5ab  | 12.43±0.13ab | 11.98±0.39b  | 12.49±0.19b  | 13.38±0.52a  | 12.6±0.16ab  | 12.93±0.37a | 11.8±0.27b  | 12.68±0.22a | 12.58±0.14b |  |
| Tango       | 11.95±0.28a | 11.18±0.20ab | 11.15±0.18ab | 10.73±0.36b  | 11.25±0.16d  | 12.775±0.15a | 12.15±0.25ab | 12.03±0.3ab | 11.5±0.29b  | 12.11±0.17b | 11.68±0.14c |  |
|             | 12.74±0.25a | 12.24±0.27b  | 12.24±0.26b  | 11.66±0.26c  |              | 12.93±0.23a  | 12.54±0.19a  | 12.54±0.22a | 11.74±0.12b |             |             |  |
| 12.22±0.14a |             |              |              |              |              | 12.44±0.11a  |              |             |             |             |             |  |
| B           |             |              |              |              |              |              |              |             |             |             |             |  |
|             | 0.5 °C      |              |              |              |              |              | 7.5 °C       |             |             |             |             |  |
|             | Control     | Vapor Gard   | 2,4-D        | GA           | Mean         | Control      | Vapor Gard   | 2,4-D       | GA          |             |             |  |
| Owari       | 12.05±2.83a | 12.35±0.16a  | 12.68±0.23a  | 8.48±0.16b   | 11.39±0.77b  | 11.73±0.17b  | 11.68±0.14b  | 12.28±0.05a | 10.45±0.18c | 11.53±0.18b | 11.46±0.39b |  |
| Page        | 12.63±0.34a | 12.35±0.12a  | 12.2±0.2a    | 11.3±0.25b   | 12.12±0.17ab | 13.48±0.08a  | 12.78±0.18ab | 12.18±0.33b | 12.2±0.34b  | 12.66±0.18a | 12.39±0.13a |  |
| W. Murcott  | 13.13±0.29a | 12.43±0.5ab  | 11.98±0.39b  | 12.43±0.13ab | 12.49±0.19a  | 13.38±0.52a  | 12.6±0.16ab  | 11.8±0.27b  | 12.93±0.37a | 12.68±0.22a | 12.58±0.14a |  |
| Tango       | 10.23±0.26a | 9.63±0.3ab   | 9.18±0.23b   | 10.1±0.46ab  | 9.78±0.18c   | 9.45±0.22b   | 9.45±0.54b   | 9.45±0.25b  | 10.775±0.5a | 9.78±0.23c  | 9.78±0.14c  |  |
|             | 12.01±0.31a | 11.69±0.33a  | 11.51±0.37ab | 10.58±0.75b  |              | 12.01±0.44a  | 11.63±0.37ab | 11.43±0.32b | 11.59±0.3ab |             |             |  |
|             | 11.44±0.24a |              |              |              |              | 11.66±0.18a  |              |             |             |             |             |  |

**Table S-3:** Fruit titratable acidity of four mandarin varieties during postharvest in response to various treatments in 2019 (A) and 2020 (B) seasons. Fruits were stored at 0.5 °C and 7.5 °C for four weeks and then for one week at 20 °C. Data are average of four replicates, and each contains 20 fruit,  $\pm$  the standard error, letters indicate the statistical difference among treatments and varieties at the level of 0.05.

A

|            | 0.5 °C        |               |              |             |            | 7.5 °C     |             |             |            |            |             |
|------------|---------------|---------------|--------------|-------------|------------|------------|-------------|-------------|------------|------------|-------------|
|            | Control       | Vapor Gard    | 2,4-D        | GA          | Mean       | Control    | Vapor Gard  | 2,4-D       | GA         | Mean       |             |
| Owari      | 1.64775±0.0ab | 1.67475±0.1ab | 1.7665±0.09a | 1.499±0.07b | 0.94±0.02c | 1.68±0.06a | 1.5±0.02b   | 1.57±0.04ab | 1.36±0.04c | 1.53±0.03b | 1.59±0.028B |
| Page       | 0.09±0.05a    | 0.45±0.22a    | 0.83±0.41a   | 0.09±0.04a  | 1.27±0.01a | 1.23±0.03a | 1.26±0.06a  | 1.2±0.06a   | 1.23±0.07a | 1.23±0.03d | 1.36±0.062C |
| W. Murcott | 1.67±0.06a    | 1.57±0.05ab   | 1.59±0.05a   | 1.4±0.06b   | 1.13±0.03b | 1.55±0.06a | 1.41±0.03ab | 1.47±0.08ab | 1.3±0.03b  | 1.43±0.03c | 1.49±0.027B |
| Tango      | 1.81±0.13a    | 1.66±0.045ab  | 1.68±0.06ab  | 1.50±0.087b | 0.84±0.02d | 1.86±0.06a | 1.78±0.05ab | 1.88±0.11a  | 1.56±0.08b | 1.77±0.05a | 1.71±0.035A |
|            | 1.09±0.04a    | 1.069±0.03a   | 1.06±0.03a   | 0.979±0.04b |            | 1.59±0.06a | 1.48±0.06b  | 1.54±0.07ab | 1.35±0.04c |            |             |
|            | 0.43±0.033A   |               |              |             |            | 0.52±0.03B |             |             |            |            |             |

B

|            | 0.5 °C     |             |             |            |            | 7.5 °C      |             |             |             |            |            |
|------------|------------|-------------|-------------|------------|------------|-------------|-------------|-------------|-------------|------------|------------|
|            | Control    | Vapor Gard  | 2,4-D       | GA         | Mean       | Control     | Vapor Gard  | 2,4-D       | GA          | Mean       |            |
| Owari      | 0.99±0.07a | 1.07±0.05a  | 1.04±0.07a  | 0.98±0.03a | 1.02±0.03c | 0.9±0.02ab  | 0.93±0.06a  | 0.8±0.04bc  | 0.77±0.02c  | 0.85±0.03c | 0.94±0.02C |
| Page       | 1.33±0.01a | 1.25±0.04a  | 1.29±0.03a  | 1.33±0.07a | 1.30±0.02a | 1.33±0.03a  | 1.22±0.03b  | 1.2±0.04b   | 1.25±0.02ab | 1.25±0.02a | 1.27±0.02A |
| W. Murcott | 1.24±0.09a | 1.18±0.09a  | 1.2±0.06a   | 0.89±0.03b | 1.13±0.05b | 1.24±0.03a  | 1.11±0.05b  | 1.18±0.02ab | 1.02±0.01c  | 1.14±0.02b | 1.13±0.07B |
| Tango      | 0.93±0.05a | 0.89±0.07a  | 0.87±0.02a  | 0.9±0.06a  | 0.89±0.02d | 0.75±0.02bc | 0.86±0.06ab | 0.88±0.04a  | 0.67±0.01c  | 0.79±0.03d | 0.84±0.02D |
|            | 1.12±0.05a | 1.10±0.05ab | 1.10±0.05ab | 1.02±0.05b |            | 1.05±0.06a  | 1.03±0.04a  | 1.01±0.05a  | 0.93±0.06b  |            |            |
|            | 1.09±0.02A |             |             |            |            | 1.01±0.03B  |             |             |             |            |            |

**Supplementary Table 4:** Fruit PH of four mandarin varieties during postharvest in response to various treatments in 2019 (A) and 2020 (B) seasons. Fruits were stored at 0.5 °C and 7.5 °C for four weeks and then for one week at 20 ° C. Data are average of four replicates, and each contains 20 fruit,  $\pm$  the standard error, letters indicate the statistical difference among treatments and varieties at the level of 0.05.

A

|                  | 0.5 °C            |                  |                  |                  |                  | 7.5 °C            |                   |                   |                  |                  |                   |
|------------------|-------------------|------------------|------------------|------------------|------------------|-------------------|-------------------|-------------------|------------------|------------------|-------------------|
|                  | Control           | Vapor Gard       | 2,4-D            | GA               | Mean             | Control           | Vapor Gard        | 2,4-D             | GA               | Mean             |                   |
| Owari            | 3.47 $\pm$ 0.05a  | 3.43 $\pm$ 0.06a | 3.45 $\pm$ 0.05a | 3.52 $\pm$ 0.09a | 3.47 $\pm$ 0.07c | 3.46 $\pm$ 0.05c  | 3.47 $\pm$ 0.04bc | 3.53 $\pm$ 0.02ab | 3.56 $\pm$ 0.06a | 3.51 $\pm$ 0.06d | 3.49 $\pm$ 0.06d  |
| Page             | 3.52 $\pm$ 0.05a  | 3.5 $\pm$ 0.11a  | 3.58 $\pm$ 0.11a | 3.57 $\pm$ 0.06a | 3.54 $\pm$ 0.08b | 3.6 $\pm$ 0.08a   | 3.58 $\pm$ 0.07a  | 3.63 $\pm$ 0.05a  | 3.62 $\pm$ 0.05a | 3.61 $\pm$ 0.06c | 3.58 $\pm$ 0.08c  |
| W. Murcott       | 3.69 $\pm$ 0.09ab | 3.66 $\pm$ 0.06b | 3.66 $\pm$ 0.04b | 3.77 $\pm$ 0.07a | 3.7 $\pm$ 0.07a  | 3.79 $\pm$ 0.08ab | 3.77 $\pm$ 0.02b  | 3.81 $\pm$ 0.09ab | 3.87 $\pm$ 0.05a | 3.81 $\pm$ 0.07a | 3.75 $\pm$ 0.090a |
| Tango            | 3.61 $\pm$ 0.13a  | 3.64 $\pm$ 0.06a | 3.64 $\pm$ 0.06a | 3.73 $\pm$ 0.09a | 3.66 $\pm$ 0.09a | 3.62 $\pm$ 0.05b  | 3.65 $\pm$ 0.04b  | 3.7 $\pm$ 0.04ab  | 3.76 $\pm$ 0.11a | 3.68 $\pm$ 0.08b | 3.67 $\pm$ 0.087b |
|                  | 3.57 $\pm$ 0.12b  | 3.56 $\pm$ 0.11b | 3.58 $\pm$ 0.12b | 3.65 $\pm$ 0.13a |                  | 3.62 $\pm$ 0.13b  | 3.63 $\pm$ 0.1b   | 3.65 $\pm$ 0.14b  | 3.7 $\pm$ 0.14a  |                  |                   |
| 3.59 $\pm$ 0.12b |                   |                  |                  |                  |                  | 3.65 $\pm$ 0.13a  |                   |                   |                  |                  |                   |

B

|                  | 0.5 °C           |                  |                  |                  |                  | 7.5 °C            |                  |                  |                  |                  |                   |
|------------------|------------------|------------------|------------------|------------------|------------------|-------------------|------------------|------------------|------------------|------------------|-------------------|
|                  | Control          | Vapor Gard       | 2,4-D            | GA               | Mean             | Control           | Vapor Gard       | 2,4-D            | GA               | Mean             |                   |
| Owari            | 3.80 $\pm$ 0.06a | 3.71 $\pm$ 0.09a | 3.78 $\pm$ 0.05a | 3.78 $\pm$ 0.06a | 3.77 $\pm$ 0.07b | 3.92 $\pm$ 0.03a  | 3.95 $\pm$ 0.08a | 3.92 $\pm$ 0.10a | 3.97 $\pm$ 0.04a | 3.94 $\pm$ 0.07a | 3.85 $\pm$ 0.11b  |
| Page             | 3.42 $\pm$ 0.05a | 3.48 $\pm$ 0.05a | 3.48 $\pm$ 0.01a | 3.46 $\pm$ 0.04a | 3.46 $\pm$ 0.04d | 3.53 $\pm$ 0.06a  | 3.55 $\pm$ 0.02a | 3.58 $\pm$ 0.02a | 3.55 $\pm$ 0.04a | 3.55 $\pm$ 0.04c | 3.51 $\pm$ 0.06d  |
| W. Murcott       | 3.61 $\pm$ 0.05b | 3.62 $\pm$ 0.09b | 3.61 $\pm$ 0.01b | 3.8 $\pm$ 0.01a  | 3.66 $\pm$ 0.09c | 3.71 $\pm$ 0.04bc | 3.77 $\pm$ 0.06b | 3.69 $\pm$ 0.02c | 3.86 $\pm$ 0.03a | 3.76 $\pm$ 0.08b | 3.70 $\pm$ 0.099c |
| Tango            | 3.85 $\pm$ 0.08a | 3.91 $\pm$ 0.05a | 3.86 $\pm$ 0.03a | 3.87 $\pm$ 0.06a | 3.87 $\pm$ 0.06a | 3.93 $\pm$ 0.03b  | 3.92 $\pm$ 0.05b | 3.93 $\pm$ 0.04b | 4 $\pm$ 0.04a    | 3.95 $\pm$ 0.05a | 3.91 $\pm$ 0.064a |
|                  | 3.67 $\pm$ 0.18b | 3.7 $\pm$ 0.18ab | 3.66 $\pm$ 0.15b | 3.73 $\pm$ 0.17a |                  | 3.77 $\pm$ 0.18b  | 3.79 $\pm$ 0.17b | 3.79 $\pm$ 0.17b | 3.85 $\pm$ 0.19a |                  |                   |
| 3.69 $\pm$ 0.17b |                  |                  |                  |                  |                  | 3.80 $\pm$ 0.17a  |                  |                  |                  |                  |                   |

**Table S-5:** Fruit TSS/Acid ratio of four mandarin varieties during postharvest in response to various treatments in 2019 (A) and 2020 (B) seasons. Fruits were stored at 0.5 °C and 7.5 °C for four weeks and then for one week at 20 ° C. Data are average of four replicates, and each contains 20 fruit,  $\pm$  the standard error, letters indicate the statistical difference among treatments and varieties at the level of 0.05.

A

|            | 0.5 °C           |                  |                  |                  |                  | 7.5 °C            |                   |                  |                   |                  |                  |
|------------|------------------|------------------|------------------|------------------|------------------|-------------------|-------------------|------------------|-------------------|------------------|------------------|
|            | Control          | Vapor Gard       | 2,4-D            | GA               | Mean             | Control           | Vapor Gard        | 2,4-D            | GA                | Mean             |                  |
| Owari      | 8.42 $\pm$ 0.32a | 7.81 $\pm$ 0.70a | 7.99 $\pm$ 0.30a | 8.37 $\pm$ 0.46a | 8.15 $\pm$ 0.5a  | 8.17 $\pm$ 0.42b  | 8.56 $\pm$ 0.39ab | 8.88 $\pm$ 0.30a | 8.72 $\pm$ 0.47ab | 8.58 $\pm$ 0.44b | 8.36 $\pm$ 0.52b |
| Page       | 8.69 $\pm$ 0.47a | 7.77 $\pm$ 1.75a | 9.07 $\pm$ 0.87a | 8.07 $\pm$ 3.12a | 8.4 $\pm$ 1.74a  | 9.48 $\pm$ 0.79a  | 9.84 $\pm$ 0.60a  | 9.97 $\pm$ 1.33a | 9.63 $\pm$ 0.73a  | 9.73 $\pm$ 0.83a | 9.06 $\pm$ 1.50a |
| W. Murcott | 7.86 $\pm$ 0.46b | 7.94 $\pm$ 0.32b | 7.86 $\pm$ 0.37b | 8.55 $\pm$ 0.42a | 8.05 $\pm$ 0.47a | 8.68 $\pm$ 0.88a  | 8.93 $\pm$ 0.43a  | 8.85 $\pm$ 0.69a | 9.08 $\pm$ 0.34a  | 8.88 $\pm$ 0.58b | 8.47 $\pm$ 0.66b |
| Tango      | 6.69 $\pm$ 0.79a | 6.75 $\pm$ 0.20a | 6.67 $\pm$ 0.55a | 7.21 $\pm$ 0.58a | 6.83 $\pm$ 0.56a | 6.88 $\pm$ 0.42ab | 6.84 $\pm$ 0.21ab | 6.46 $\pm$ 0.63b | 7.43 $\pm$ 0.44a  | 6.90 $\pm$ 0.54c | 6.87 $\pm$ 0.54c |
|            | 7.91 $\pm$ 0.92a | 7.61 $\pm$ 0.96a | 7.85 $\pm$ 1.05a | 8.05 $\pm$ 1.54a |                  | 8.30 $\pm$ 1.14a  | 8.62 $\pm$ 1.19a  | 8.46 $\pm$ 1.51a | 8.71 $\pm$ 0.96a  |                  |                  |
|            | 7.86 $\pm$ 1.13b |                  |                  |                  |                  | 8.53 $\pm$ 1.20a  |                   |                  |                   |                  |                  |

B

|            | 0.5 °C            |                   |                   |                   |                    | 7.5 °C             |                    |                    |                   |                   |                   |
|------------|-------------------|-------------------|-------------------|-------------------|--------------------|--------------------|--------------------|--------------------|-------------------|-------------------|-------------------|
|            | Control           | Vapor Gard        | 2,4-D             | GA                | Mean               | Control            | Vapor Gard         | 2,4-D              | GA                | Mean              |                   |
| Owari      | 12.30 $\pm$ 1.36a | 12.29 $\pm$ 1.72a | 11.60 $\pm$ 1.11a | 11.29 $\pm$ 0.55a | 11.91 $\pm$ 1.24a  | 13 $\pm$ 0.38b     | 15.57 $\pm$ 1.75a  | 12.73 $\pm$ 1.60b  | 13.56 $\pm$ 0.93b | 13.71 $\pm$ 1.63a | 12.84 $\pm$ 1.70a |
| Page       | 9.52 $\pm$ 0.47a  | 9.92 $\pm$ 0.62a  | 9.46 $\pm$ 0.19a  | 8.52 $\pm$ 0.52b  | 9.36 $\pm$ 0.68c   | 10.14 $\pm$ 0.57ab | 10.5 $\pm$ 0.54a   | 10.15 $\pm$ 0.20ab | 9.79 $\pm$ 0.24b  | 10.15 $\pm$ 0.46d | 9.75 $\pm$ 0.70c  |
| W. Murcott | 10.73 $\pm$ 1.71b | 10.78 $\pm$ 2.14b | 10.13 $\pm$ 1.66b | 14.09 $\pm$ 1.17a | 11.43 $\pm$ 2.21ab | 10.85 $\pm$ 1.07bc | 11.45 $\pm$ 1.22ab | 9.97 $\pm$ 0.62c   | 12.65 $\pm$ 0.72a | 11.23 $\pm$ 2c    | 11.33 $\pm$ 1.79b |
| Tango      | 11.08 $\pm$ 0.76a | 11.01 $\pm$ 1.13a | 10.55 $\pm$ 0.68a | 11.32 $\pm$ 0.78a | 10.99 $\pm$ 0.82b  | 12.68 $\pm$ 0.74b  | 11.02 $\pm$ 0.99bc | 10.83 $\pm$ 0.68c  | 16.22 $\pm$ 1.68a | 12.68 $\pm$ 1.31b | 11.84 $\pm$ 1.99b |
|            | 10.91 $\pm$ 1.47a | 10.83 $\pm$ 1.37a | 10.61 $\pm$ 1.55a | 11.3 $\pm$ 2.23a  |                    | 11.67 $\pm$ 1.40b  | 11.42 $\pm$ 1.34b  | 11.63 $\pm$ 2.53b  | 13.06 $\pm$ 2.55a |                   |                   |
|            | 10.91 $\pm$ 1.66b |                   |                   |                   |                    | 11.94 $\pm$ 2.10a  |                    |                    |                   |                   |                   |

**Table S-6:** Total monthly precipitation from color break stage to harvest during the two years of the study. Data obtained from CIMS <https://cimis.water.ca.gov/>

|          | Total Precipitation (mm) |           |
|----------|--------------------------|-----------|
|          | 2019/2020                | 2020/2021 |
| October  | 0                        | 0         |
| November | 26                       | 10.2      |
| December | 57.8                     | 24.2      |
| January  | 14.8                     | 50.9      |
| February | 6.9                      | 18.7      |
| March    | 51.7                     | 29.7      |

**Table S-7:** Fruit quality of the four mandarin varieties as affected by years. Data are average of four replicates, and each contains 20 fruit,  $\pm$  the standard error, letters indicate the statistical difference between years at the level of 0.05.

|                                | Varieties                   |                            |                            |                            |
|--------------------------------|-----------------------------|----------------------------|----------------------------|----------------------------|
|                                | Satsuma                     | Page                       | W. Marcotte                | Tango                      |
| <b>Fruit weight (g)</b>        |                             |                            |                            |                            |
| 2019                           | 92.42 $\pm$ 1.40 <b>b</b>   | 102.18 $\pm$ 3.99 <b>a</b> | 79.02 $\pm$ 4.67 <b>a</b>  | 102.25 $\pm$ 3.57 <b>a</b> |
| 2020                           | 130.25 $\pm$ 27.22 <b>a</b> | 86.50 $\pm$ 3.63 <b>b</b>  | 83.13 $\pm$ 10.19 <b>a</b> | 65.88 $\pm$ 2.13 <b>b</b>  |
| <b>Fruit width (cm)</b>        |                             |                            |                            |                            |
| 2019                           | 5.83 $\pm$ 0.05 <b>a</b>    | 5.54 $\pm$ 0.14 <b>a</b>   | 7.20 $\pm$ 0.30 <b>a</b>   | 4.38 $\pm$ 0.15 <b>b</b>   |
| 2020                           | 5.71 $\pm$ 0.15 <b>a</b>    | 5.28 $\pm$ 0.06 <b>b</b>   | 4.62 $\pm$ 0.27 <b>b</b>   | 6.567 $\pm$ 0.22 <b>a</b>  |
| <b>Fruit length (cm)</b>       |                             |                            |                            |                            |
| 2029                           | 6.16 $\pm$ 0.05 <b>b</b>    | 5.90 $\pm$ 0.04 <b>a</b>   | 8.69 $\pm$ 0.25 <b>a</b>   | 5.53 $\pm$ 0.18 <b>b</b>   |
| 2020                           | 7.13 $\pm$ 0.19 <b>a</b>    | 5.55 $\pm$ 0.13 <b>b</b>   | 5.85 $\pm$ 0.22 <b>b</b>   | 8.29 $\pm$ 0.27 <b>a</b>   |
| <b>Fruit Color Index (a/b)</b> |                             |                            |                            |                            |
| 2029                           | 0.38 $\pm$ 0.03 <b>a</b>    | 0.58 $\pm$ 0.02 <b>a</b>   | 0.50 $\pm$ 0.57 <b>a</b>   | 0.49 $\pm$ 0.54 <b>a</b>   |
| 2020                           | 0.31 $\pm$ 0.05 <b>b</b>    | 0.57 $\pm$ 0.03 <b>a</b>   | 0.53 $\pm$ 0.60 <b>a</b>   | 0.55 $\pm$ 0.58 <b>b</b>   |
| <b>Fruit Firmness (g/mm)</b>   |                             |                            |                            |                            |
| 2019                           | 324.11 $\pm$ 43.3 <b>a</b>  | 678.41 $\pm$ 57.5 <b>a</b> | 607.21 $\pm$ 55.6 <b>a</b> | 630.87 $\pm$ 36.6 <b>a</b> |
| 2020                           | 332.15 $\pm$ 109.6 <b>a</b> | 529.46 $\pm$ 41.7 <b>b</b> | 388.39 $\pm$ 53.1 <b>b</b> | 303.09 $\pm$ 21.3 <b>b</b> |
| <b>Juice Brix (%)</b>          |                             |                            |                            |                            |
| 2019                           | 12.95 $\pm$ 0.30 <b>a</b>   | 12.03 $\pm$ 0.05 <b>a</b>  | 12.35 $\pm$ 0.40 <b>a</b>  | 11.48 $\pm$ 0.49 <b>a</b>  |
| 2020                           | 11.98 $\pm$ 0.35 <b>b</b>   | 12.25 $\pm$ 1.52 <b>a</b>  | 12.35 $\pm$ 0.40 <b>a</b>  | 10.58 $\pm$ 1.00 <b>a</b>  |
| <b>Juice acidity (%)</b>       |                             |                            |                            |                            |
| 2019                           | 1.77 $\pm$ 0.11 <b>a</b>    | 1.69 $\pm$ 0.11 <b>a</b>   | 1.68 $\pm$ 0.07 <b>a</b>   | 1.81 $\pm$ 0.161 <b>a</b>  |
| 2020                           | 1.45 $\pm$ 0.06 <b>b</b>    | 1.52 $\pm$ 0.13 <b>a</b>   | 1.68 $\pm$ 0.06 <b>a</b>   | 1.36 $\pm$ 0.20 <b>b</b>   |
| <b>TSS/acid Ratio</b>          |                             |                            |                            |                            |
| 2019                           | 7.32 $\pm$ 0.52 <b>b</b>    | 7.13 $\pm$ 0.43 <b>a</b>   | 7.34 $\pm$ 0.18 <b>a</b>   | 6.39 $\pm$ 0.75 <b>b</b>   |
| 2020                           | 8.29 $\pm$ 0.35 <b>a</b>    | 8.07 $\pm$ 0.91 <b>a</b>   | 7.35 $\pm$ 0.14 <b>a</b>   | 7.89 $\pm$ 1.41 <b>a</b>   |
| <b>Juice pH</b>                |                             |                            |                            |                            |
| 2019                           | 3.33 $\pm$ 0.05 <b>b</b>    | 3.26 $\pm$ 0.03 <b>a</b>   | 3.57 $\pm$ 0.28 <b>a</b>   | 3.34 $\pm$ 0.07 <b>b</b>   |
| 2020                           | 3.44 $\pm$ 0.04 <b>a</b>    | 3.32 $\pm$ 0.05 <b>a</b>   | 3.45 $\pm$ 0.11 <b>a</b>   | 3.56 $\pm$ 0.10 <b>a</b>   |

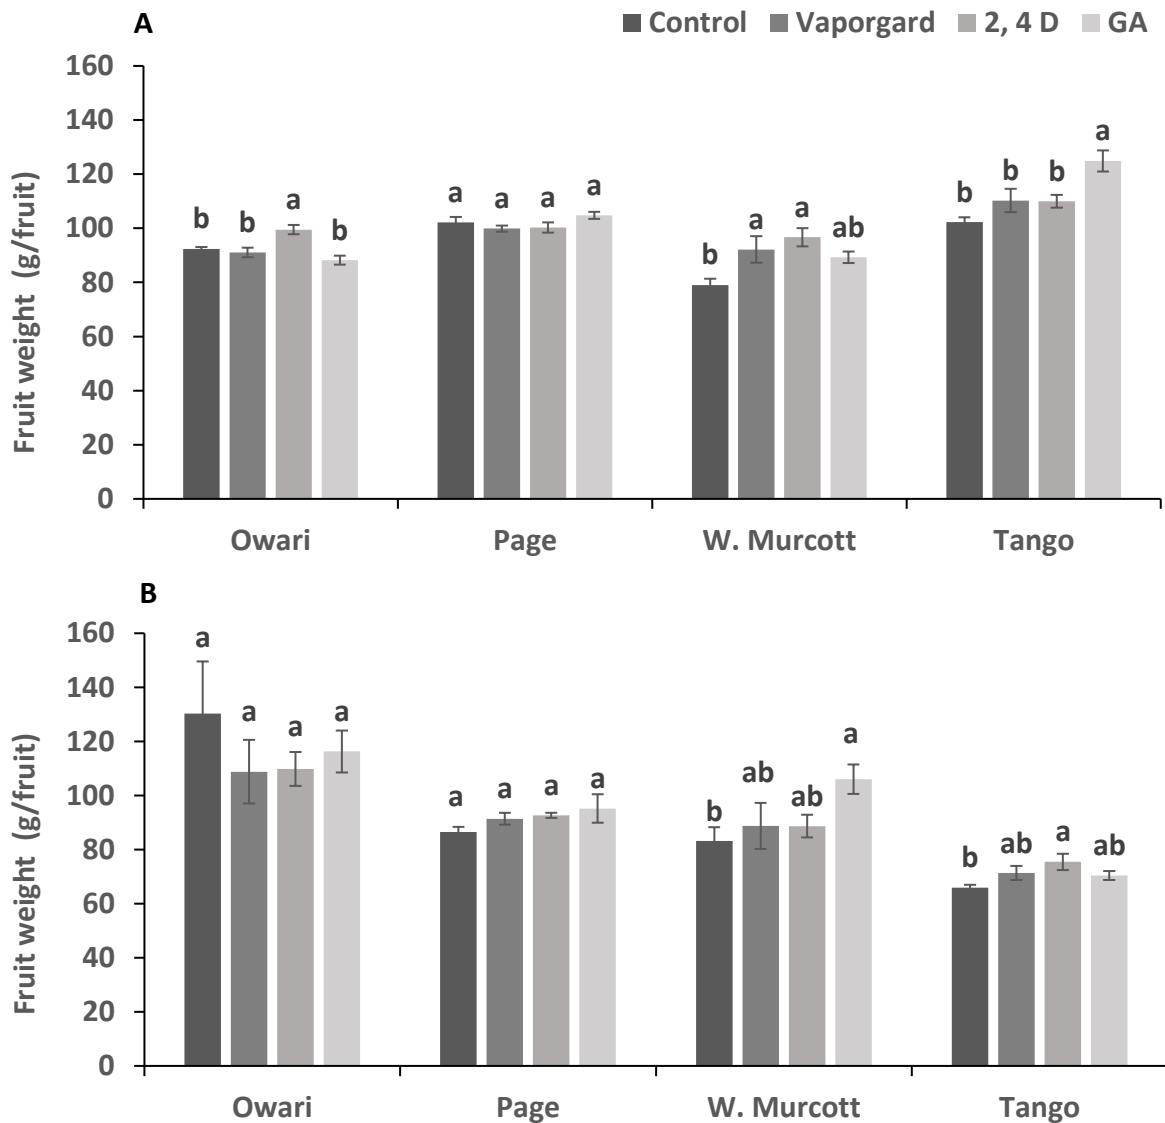

**Figure S-1:** Effect of various treatments on fruit weight of four mandarin varieties at harvest during the 2019 (A) and 2020 seasons (B). Letters indicate the difference among all treatments and varieties ( $P \leq 0.05$ )



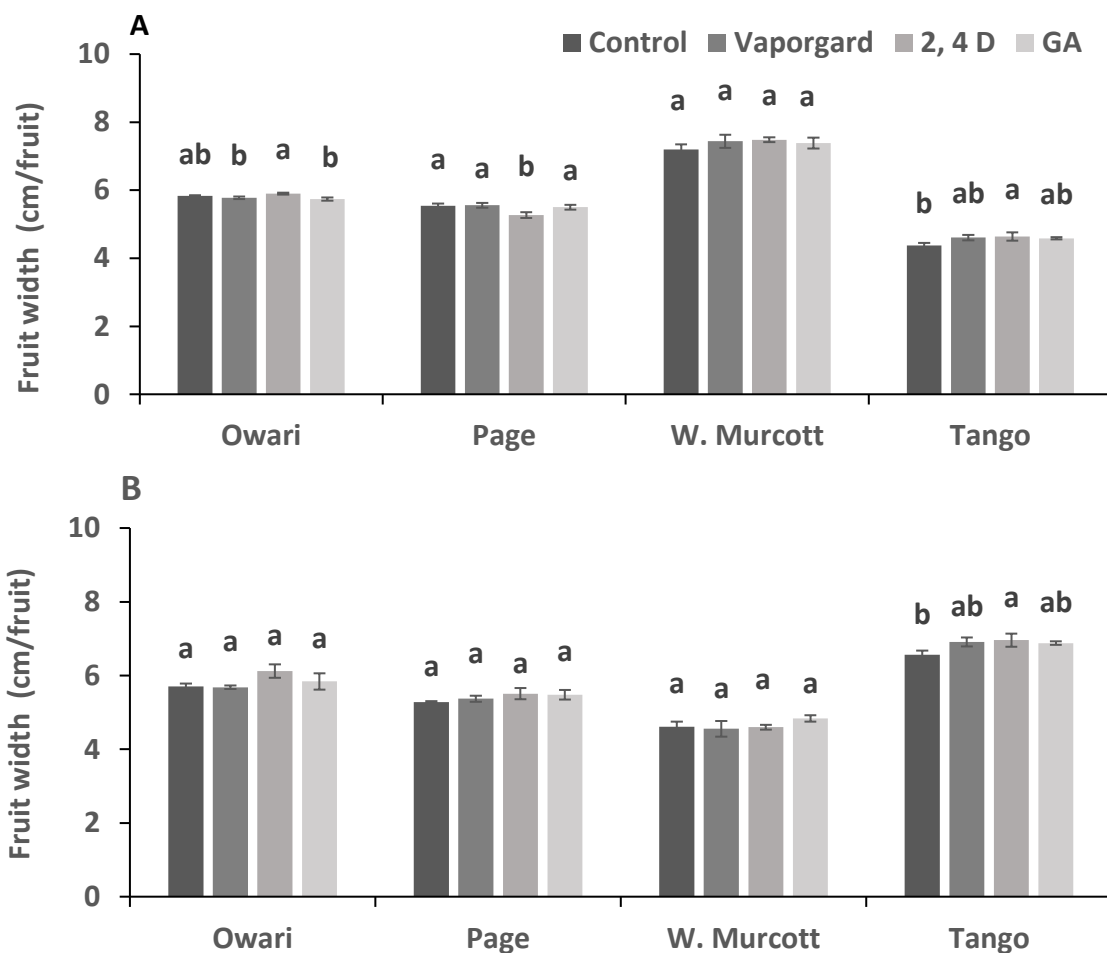

**Figure S-2:** Effect of various treatments on fruit width of four mandarin varieties at harvest during the 2019 (A) and 2020 seasons (B). Letters indicate the difference among all treatments and varieties ( $P \leq 0.05$ )

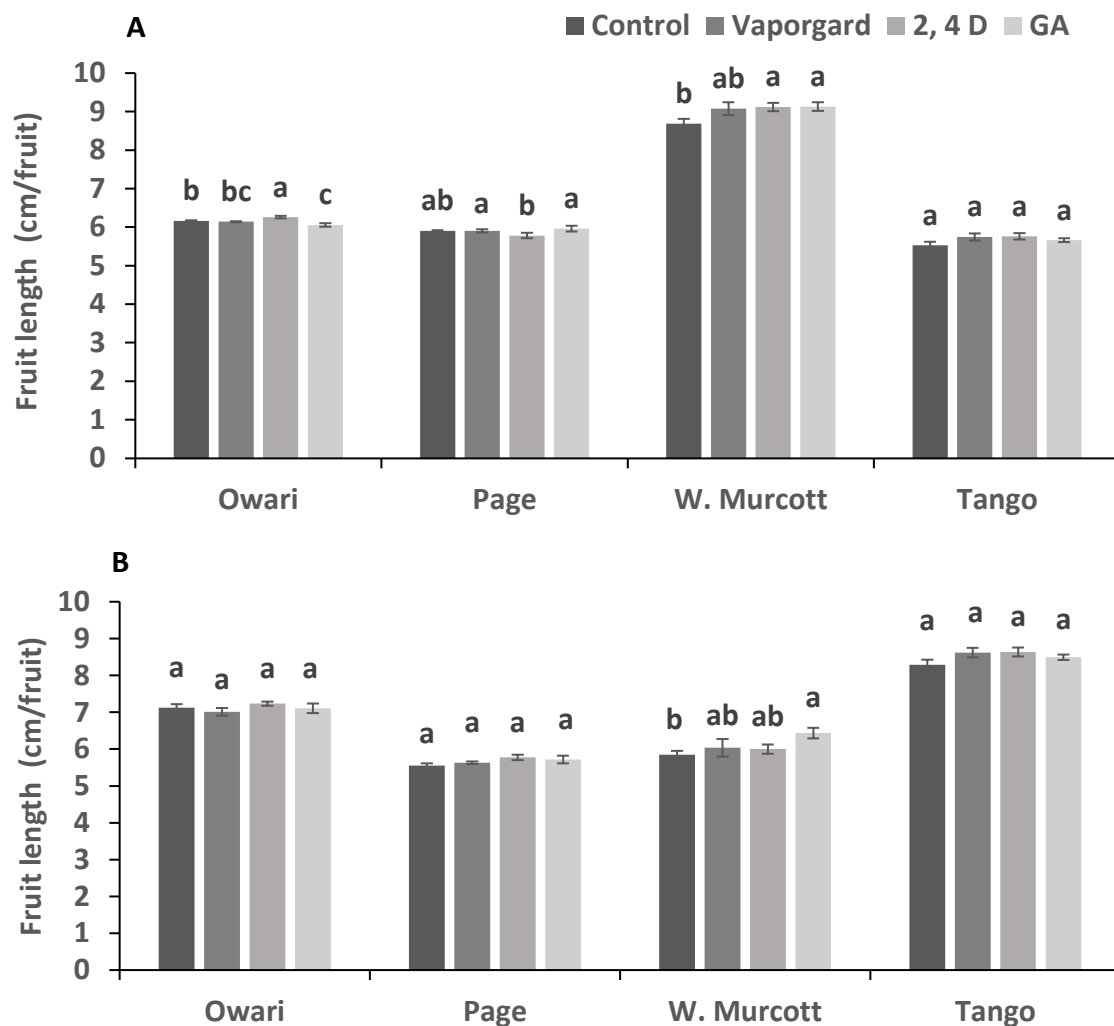

**Figure S-3:** Effect of various treatments on fruit length of four mandarin varieties at harvest during the 2019 (A) and 2020 seasons (B). Letters indicate the difference among all treatments and varieties ( $P \leq 0.05$ )

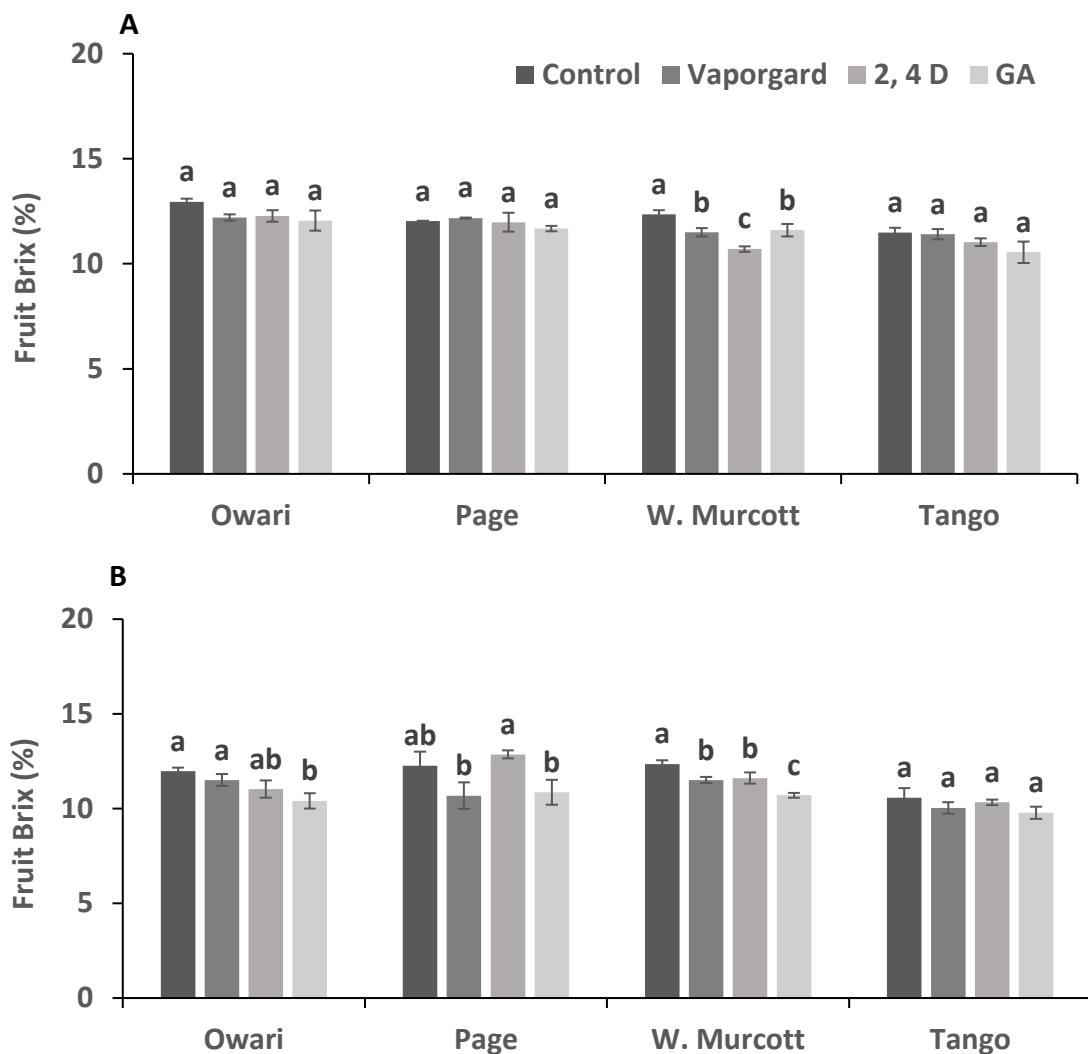

**Figure S-4:** Effect of various treatments on fruit sugar content (Brix) of four mandarin varieties at harvest during the 2019 (A) and 2020 seasons (B). Letters indicate the difference among all treatments and varieties ( $P \leq 0.05$ )

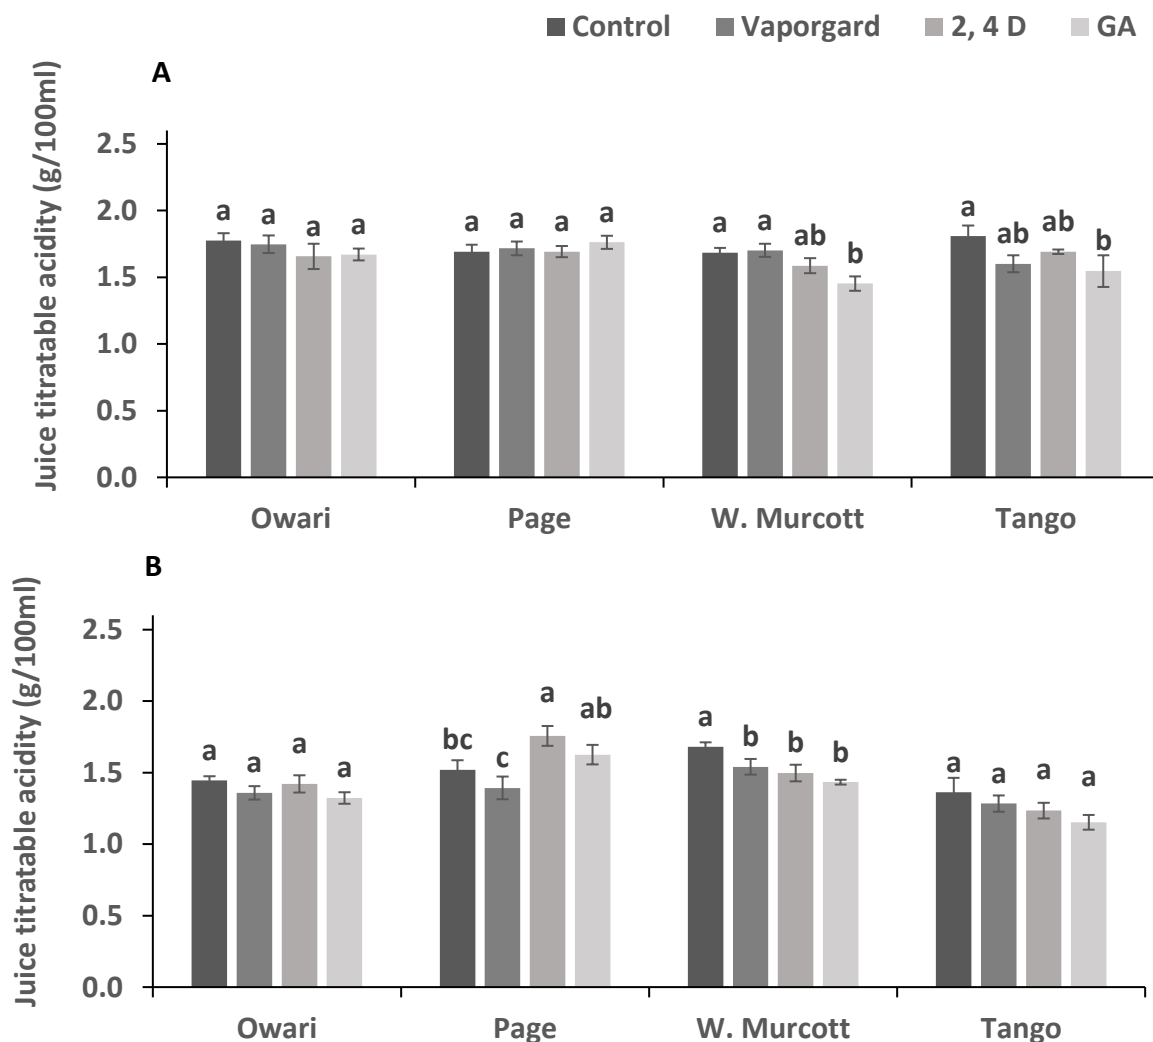

**Figure S-5:** Effect of various treatments on fruit titratable acidity content of four mandarin varieties at harvest during the 2019 (A) and 2020 seasons (B). Letters indicate the difference among all treatments and varieties ( $P \leq 0.05$ )

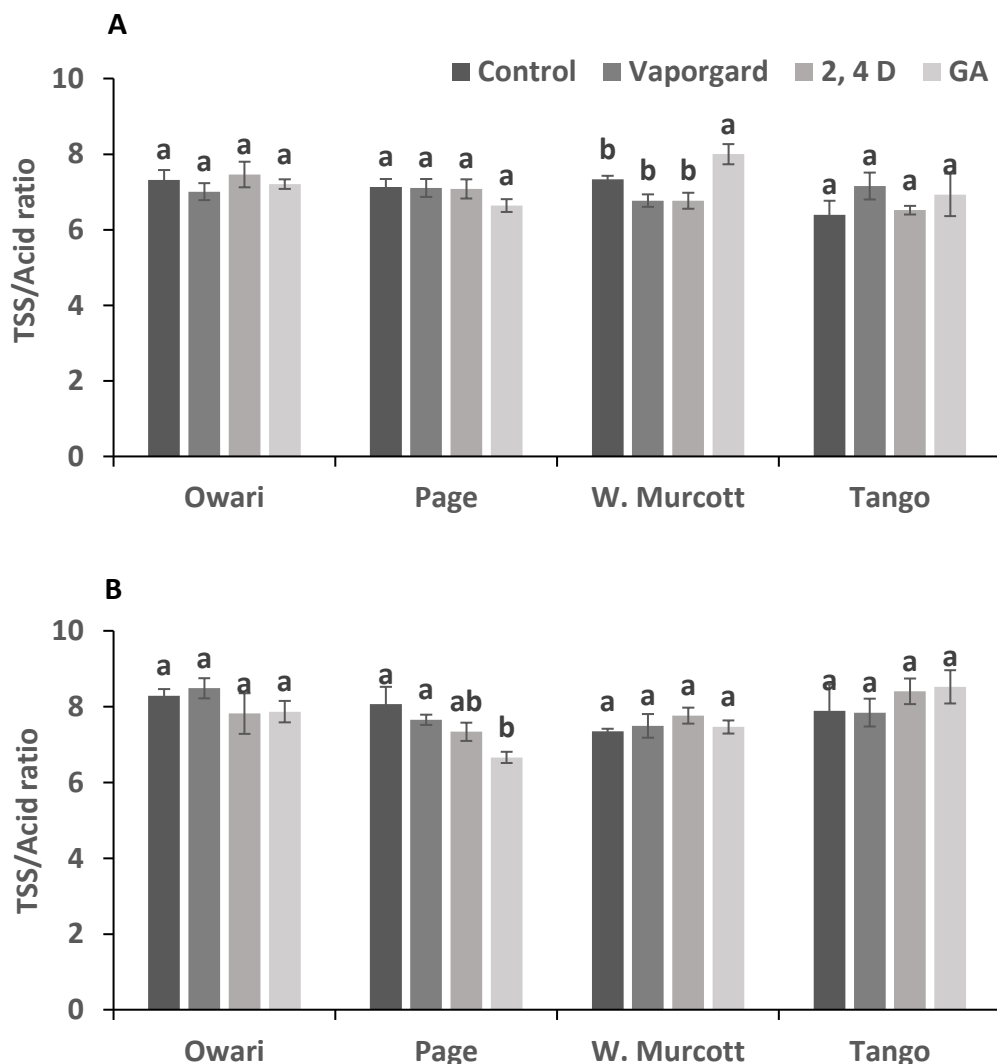

**Figure S-6:** Effect of various treatments on fruit TSS/Acid ratio of four mandarin varieties at harvest during the 2019 (A) and 2020 seasons (B). Letters indicate the difference among all treatments and varieties ( $P \leq 0.05$ )

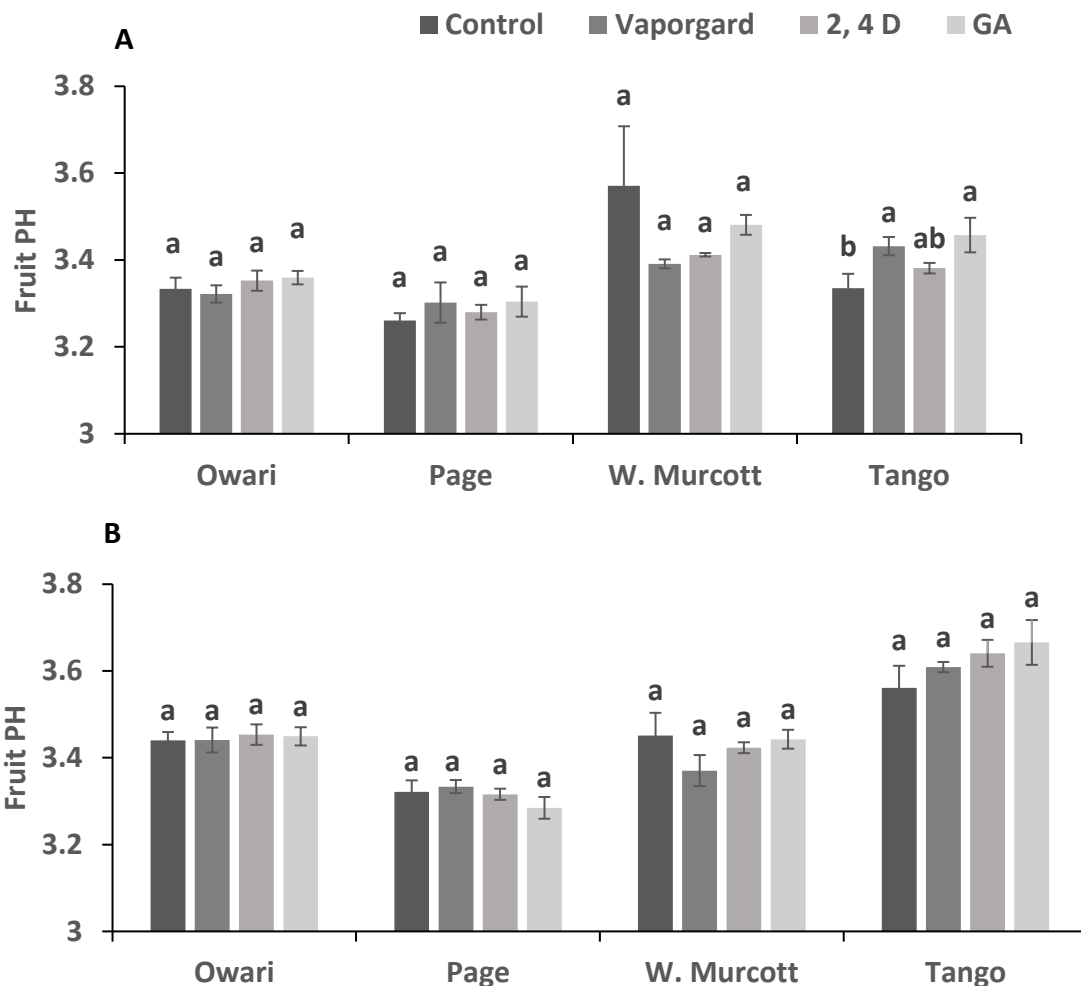

**Figure S-7:** Effect of various treatments on fruit PH of four mandarin varieties at harvest during the 2019 (A) and 2020 seasons (B). Letters indicate the difference among all treatments and varieties ( $P \leq 0.05$ )
